# Supplementary material for: Genetic diversity, relatedness and inbreeding of ranched and fragmented Cape buffalo populations in southern Africa
Source: PLoS One. 2020 Aug 14;15(8):e0236717. doi: 10.1371/journal.pone.0236717 (PMC7428177; doi:10.1371/journal.pone.0236717)
Supplement: S8 Table — Both the full data set (FDS) and relatives removed (RR) data set are shown. (XLSX) [file pone.0236717.s013.xlsx]

## Sheet: Sheet1
S8 Table. Original and Bonferroni-corrected linkage disequilibrium p-values of all pairs of loci in all sampling localities. Both the full data set (FDS) and relatives removed (RR) data set are shown.
Locality	Locus1	Locus2	FDS_p-value	FDS_p-value_Bonferroni	RR_p-value	RR_p-value_Bonferroni
AENP	BM1824bu	BM3205bu	0	0	0.370011	1
AENP	BM1824bu	BM3517bu	0.500714	1	0.917206	1
AENP	BM3205bu	BM3517bu	0.87623	1	0.319411	1
AENP	BM1824bu	BM719buf	0.081124	1	0.602851	1
AENP	BM3205bu	BM719buf	0.223226	1	0.767085	1
AENP	BM3517bu	BM719buf	0.150886	1	0.187426	1
AENP	BM1824bu	CSSM19bu	0	0	0.013612	1
AENP	BM3205bu	CSSM19bu	0.144418	1	0.644078	1
AENP	BM3517bu	CSSM19bu	0.282608	1	0.43288	1
AENP	BM719buf	CSSM19bu	0.34252	1	0.205416	1
AENP	BM1824bu	ETH10buf	0.02932	1	0.124333	1
AENP	BM3205bu	ETH10buf	0.097554	1	0.596525	1
AENP	BM3517bu	ETH10buf	0.35983	1	0.703267	1
AENP	BM719buf	ETH10buf	0.259198	1	0.388227	1
AENP	CSSM19bu	ETH10buf	0.156718	1	0.655009	1
AENP	BM1824bu	ILSTS026	0.544576	1	0.422424	1
AENP	BM3205bu	ILSTS026	0.921974	1	0.397691	1
AENP	BM3517bu	ILSTS026	0.917856	1	1	1
AENP	BM719buf	ILSTS026	0.696288	1	0.987789	1
AENP	CSSM19bu	ILSTS026	0.877514	1	1	1
AENP	ETH10buf	ILSTS026	0.398102	1	0.311795	1
AENP	BM1824bu	INRA006b	0.761484	1	0.59173	1
AENP	BM3205bu	INRA006b	0.955634	1	0.719473	1
AENP	BM3517bu	INRA006b	0.5261	1	0.60493	1
AENP	BM719buf	INRA006b	0.65158	1	0.371076	1
AENP	CSSM19bu	INRA006b	0.363366	1	0.764023	1
AENP	ETH10buf	INRA006b	0.6551	1	0.787619	1
AENP	ILSTS026	INRA006b	0.546254	1	1	1
AENP	BM1824bu	SPS115bu	0.90515	1	0.784508	1
AENP	BM3205bu	SPS115bu	0.385834	1	0.441105	1
AENP	BM3517bu	SPS115bu	0.569344	1	0.685582	1
AENP	BM719buf	SPS115bu	0.444672	1	1	1
AENP	CSSM19bu	SPS115bu	0.0538	1	0.267241	1
AENP	ETH10buf	SPS115bu	0.290646	1	0.503075	1
AENP	ILSTS026	SPS115bu	0.065504	1	0.504841	1
AENP	INRA006b	SPS115bu	0.152318	1	0.654446	1
AENP	BM1824bu	TGLA227b	0.097226	1	0.235168	1
AENP	BM3205bu	TGLA227b	0.25308	1	0.503355	1
AENP	BM3517bu	TGLA227b	0.663198	1	0.636836	1
AENP	BM719buf	TGLA227b	0.664874	1	0.907366	1
AENP	CSSM19bu	TGLA227b	0.241386	1	0.076083	1
AENP	ETH10buf	TGLA227b	0.66871	1	0.517565	1
AENP	ILSTS026	TGLA227b	0.34323	1	0.887181	1
AENP	INRA006b	TGLA227b	0.149608	1	0.359785	1
AENP	SPS115bu	TGLA227b	0.742778	1	0.840668	1
AENP	BM1824bu	TGLA263b	0.78022	1	0.926363	1
AENP	BM3205bu	TGLA263b	0.98378	1	0.701853	1
AENP	BM3517bu	TGLA263b	0.777964	1	0.549671	1
AENP	BM719buf	TGLA263b	0.752076	1	0.90162	1
AENP	CSSM19bu	TGLA263b	0.54595	1	0.436357	1
AENP	ETH10buf	TGLA263b	0.732794	1	1	1
AENP	ILSTS026	TGLA263b	0.548538	1	0.175443	1
AENP	INRA006b	TGLA263b	0.694274	1	0.489283	1
AENP	SPS115bu	TGLA263b	0.554172	1	0.853101	1
AENP	TGLA227b	TGLA263b	0.459834	1	0.694223	1
GNP	BM1824bu	BM3205bu	0.157466	1	NA	1
GNP	BM1824bu	BM3517bu	0.80538	1	1	1
GNP	BM3205bu	BM3517bu	1	1	NA	1
GNP	BM1824bu	BM719buf	1	1	1	1
GNP	BM3205bu	BM719buf	1	1	NA	1
GNP	BM3517bu	BM719buf	1	1	1	1
GNP	BM1824bu	CSSM19bu	0.0185	1	0.399532	1
GNP	BM3205bu	CSSM19bu	0.1642	1	NA	1
GNP	BM3517bu	CSSM19bu	0.632912	1	0.668767	1
GNP	BM719buf	CSSM19bu	1	1	1	1
GNP	BM1824bu	ETH10buf	0.594094	1	0.369699	1
GNP	BM3205bu	ETH10buf	0.121564	1	NA	1
GNP	BM3517bu	ETH10buf	0.45626	1	0.558188	1
GNP	BM719buf	ETH10buf	0.760558	1	0.459398	1
GNP	CSSM19bu	ETH10buf	0.830358	1	0.66462	1
GNP	BM1824bu	ILSTS026	0.757024	1	1	1
GNP	BM3205bu	ILSTS026	1	1	NA	1
GNP	BM3517bu	ILSTS026	0.797746	1	1	1
GNP	BM719buf	ILSTS026	0.54469	1	0.298252	1
GNP	CSSM19bu	ILSTS026	0.715698	1	1	1
GNP	ETH10buf	ILSTS026	0.646242	1	0.564544	1
GNP	BM1824bu	INRA006b	0.484294	1	1	1
GNP	BM3205bu	INRA006b	1	1	NA	1
GNP	BM3517bu	INRA006b	0.20106	1	0.201057	1
GNP	BM719buf	INRA006b	0.226572	1	0.0461	1
GNP	CSSM19bu	INRA006b	0.162724	1	0.692271	1
GNP	ETH10buf	INRA006b	0.760454	1	0.573417	1
GNP	ILSTS026	INRA006b	0.0032	1	0.035352	1
GNP	BM1824bu	SPS115bu	1	1	1	1
GNP	BM3205bu	SPS115bu	1	1	NA	1
GNP	BM3517bu	SPS115bu	0.807054	1	1	1
GNP	BM719buf	SPS115bu	0.303038	1	1	1
GNP	CSSM19bu	SPS115bu	1	1	1	1
GNP	ETH10buf	SPS115bu	0.686496	1	0.581169	1
GNP	ILSTS026	SPS115bu	0.139822	1	0.202538	1
GNP	INRA006b	SPS115bu	0.749726	1	0.471624	1
GNP	BM1824bu	TGLA227b	0.24942	1	0.754139	1
GNP	BM3205bu	TGLA227b	0.454366	1	NA	1
GNP	BM3517bu	TGLA227b	0.503626	1	0.854254	1
GNP	BM719buf	TGLA227b	0.689904	1	0.360338	1
GNP	CSSM19bu	TGLA227b	0.057386	1	0.345556	1
GNP	ETH10buf	TGLA227b	0.76431	1	0.720167	1
GNP	ILSTS026	TGLA227b	0.693558	1	0.555424	1
GNP	INRA006b	TGLA227b	0.011932	1	0.345836	1
GNP	SPS115bu	TGLA227b	0.8748	1	1	1
GNP	BM1824bu	TGLA263b	0.868004	1	0.720063	1
GNP	BM3205bu	TGLA263b	1	1	NA	1
GNP	BM3517bu	TGLA263b	0.71113	1	0.562548	1
GNP	BM719buf	TGLA263b	0.553902	1	1	1
GNP	CSSM19bu	TGLA263b	0.57962	1	0.780055	1
GNP	ETH10buf	TGLA263b	0.256414	1	0.165636	1
GNP	ILSTS026	TGLA263b	0.652674	1	0.378389	1
GNP	INRA006b	TGLA263b	0.730932	1	0.695536	1
GNP	SPS115bu	TGLA263b	0.69425	1	1	1
GNP	TGLA227b	TGLA263b	0.187012	1	0.274161	1
MNP	BM1824bu	BM3205bu	0.859046	1	1	1
MNP	BM1824bu	BM3517bu	0.136264	1	0.441589	1
MNP	BM3205bu	BM3517bu	0.863564	1	0.711943	1
MNP	BM1824bu	BM719buf	0.05474	1	1	1
MNP	BM3205bu	BM719buf	0.062048	1	1	1
MNP	BM3517bu	BM719buf	0.971218	1	1	1
MNP	BM1824bu	CSSM19bu	0.0417	1	0.185682	1
MNP	BM3205bu	CSSM19bu	0.133622	1	1	1
MNP	BM3517bu	CSSM19bu	0.497676	1	0.885001	1
MNP	BM719buf	CSSM19bu	0.003278	1	1	1
MNP	BM1824bu	ETH10buf	0.430666	1	0.714674	1
MNP	BM3205bu	ETH10buf	0.358918	1	0.473831	1
MNP	BM3517bu	ETH10buf	0.928912	1	0.96081	1
MNP	BM719buf	ETH10buf	0.93852	1	0.429981	1
MNP	CSSM19bu	ETH10buf	0.116412	1	0.426204	1
MNP	BM1824bu	ILSTS026	0.036806	1	1	1
MNP	BM3205bu	ILSTS026	0.50927	1	1	1
MNP	BM3517bu	ILSTS026	0.57515	1	1	1
MNP	BM719buf	ILSTS026	0.142878	1	0.127661	1
MNP	CSSM19bu	ILSTS026	0.299646	1	1	1
MNP	ETH10buf	ILSTS026	0.348342	1	0.729132	1
MNP	BM1824bu	INRA006b	0.452946	1	0.242193	1
MNP	BM3205bu	INRA006b	0.451806	1	0.612068	1
MNP	BM3517bu	INRA006b	0.915564	1	0.990102	1
MNP	BM719buf	INRA006b	0.668208	1	1	1
MNP	CSSM19bu	INRA006b	0.539008	1	0.547838	1
MNP	ETH10buf	INRA006b	0.154424	1	0.179887	1
MNP	ILSTS026	INRA006b	0.801924	1	1	1
MNP	BM1824bu	SPS115bu	1	1	1	1
MNP	BM3205bu	SPS115bu	0.334344	1	0.04036	1
MNP	BM3517bu	SPS115bu	0.283124	1	1	1
MNP	BM719buf	SPS115bu	0.30741	1	1	1
MNP	CSSM19bu	SPS115bu	1	1	1	1
MNP	ETH10buf	SPS115bu	0.94287	1	0.862938	1
MNP	ILSTS026	SPS115bu	0.106344	1	1	1
MNP	INRA006b	SPS115bu	0.836548	1	1	1
MNP	BM1824bu	TGLA227b	0.802264	1	0.73225	1
MNP	BM3205bu	TGLA227b	0.442312	1	0.200995	1
MNP	BM3517bu	TGLA227b	0.834244	1	0.818598	1
MNP	BM719buf	TGLA227b	0.485208	1	0.815798	1
MNP	CSSM19bu	TGLA227b	0.977992	1	1	1
MNP	ETH10buf	TGLA227b	0.911158	1	1	1
MNP	ILSTS026	TGLA227b	0.185842	1	0.276012	1
MNP	INRA006b	TGLA227b	0.505396	1	0.523432	1
MNP	SPS115bu	TGLA227b	0.909896	1	0.776615	1
MNP	BM1824bu	TGLA263b	0.405596	1	0.402667	1
MNP	BM3205bu	TGLA263b	0.142514	1	1	1
MNP	BM3517bu	TGLA263b	0.687236	1	0.641021	1
MNP	BM719buf	TGLA263b	0.139546	1	0.714248	1
MNP	CSSM19bu	TGLA263b	0.194754	1	0.357276	1
MNP	ETH10buf	TGLA263b	0.847126	1	0.866516	1
MNP	ILSTS026	TGLA263b	0.057142	1	0.013432	1
MNP	INRA006b	TGLA263b	0.140904	1	0.128269	1
MNP	SPS115bu	TGLA263b	0.570374	1	1	1
MNP	TGLA227b	TGLA263b	0.120232	1	0.353031	1
WPP	BM1824bu	BM3205bu	0	0	0.831723	1
WPP	BM1824bu	BM3517bu	0.165494	1	0.338773	1
WPP	BM3205bu	BM3517bu	0.325132	1	0.659952	1
WPP	BM1824bu	BM719buf	0.970624	1	1	1
WPP	BM3205bu	BM719buf	0.673664	1	0.902234	1
WPP	BM3517bu	BM719buf	0.383396	1	0.459085	1
WPP	BM1824bu	CSSM19bu	0	0	0	1
WPP	BM3205bu	CSSM19bu	0	0	0.021328	1
WPP	BM3517bu	CSSM19bu	0.473048	1	0.770782	1
WPP	BM719buf	CSSM19bu	0.29709	1	0.609291	1
WPP	BM1824bu	ETH10buf	0.483672	1	0.978111	1
WPP	BM3205bu	ETH10buf	0.136998	1	0.771437	1
WPP	BM3517bu	ETH10buf	0.914972	1	0.375745	1
WPP	BM719buf	ETH10buf	0.50249	1	0.304892	1
WPP	CSSM19bu	ETH10buf	0.962804	1	0.989003	1
WPP	BM1824bu	ILSTS026	0.573024	1	0.96188	1
WPP	BM3205bu	ILSTS026	0.397186	1	0.923119	1
WPP	BM3517bu	ILSTS026	0.330218	1	0.982233	1
WPP	BM719buf	ILSTS026	0.00242	1	0.020809	1
WPP	CSSM19bu	ILSTS026	0.579448	1	0.54642	1
WPP	ETH10buf	ILSTS026	0.467608	1	0.933676	1
WPP	BM1824bu	INRA006b	0.42214	1	0.93516	1
WPP	BM3205bu	INRA006b	0.416792	1	0.946701	1
WPP	BM3517bu	INRA006b	0.006342	1	0.654071	1
WPP	BM719buf	INRA006b	0.03818	1	0.261652	1
WPP	CSSM19bu	INRA006b	0.19898	1	0.793465	1
WPP	ETH10buf	INRA006b	0.019062	1	0.183756	1
WPP	ILSTS026	INRA006b	0	0	0.01624	1
WPP	BM1824bu	SPS115bu	0.285022	1	0.335891	1
WPP	BM3205bu	SPS115bu	0.939658	1	0.817434	1
WPP	BM3517bu	SPS115bu	0.295484	1	0.240831	1
WPP	BM719buf	SPS115bu	0.934716	1	1	1
WPP	CSSM19bu	SPS115bu	0.021546	1	0.148685	1
WPP	ETH10buf	SPS115bu	0.4617	1	0.404733	1
WPP	ILSTS026	SPS115bu	0.734472	1	0.844606	1
WPP	INRA006b	SPS115bu	0.023376	1	0.7334	1
WPP	BM1824bu	TGLA227b	0.166302	1	0.668101	1
WPP	BM3205bu	TGLA227b	0.70392	1	0.978948	1
WPP	BM3517bu	TGLA227b	0.524636	1	0.974927	1
WPP	BM719buf	TGLA227b	0.78603	1	0.566941	1
WPP	CSSM19bu	TGLA227b	0.572032	1	0.842603	1
WPP	ETH10buf	TGLA227b	0.63771	1	0.570735	1
WPP	ILSTS026	TGLA227b	0.133442	1	0.358906	1
WPP	INRA006b	TGLA227b	0.145896	1	0.101119	1
WPP	SPS115bu	TGLA227b	0.290288	1	0.48281	1
WPP	BM1824bu	TGLA263b	0.261504	1	0.992242	1
WPP	BM3205bu	TGLA263b	0.902148	1	0.980335	1
WPP	BM3517bu	TGLA263b	0.730126	1	0.961179	1
WPP	BM719buf	TGLA263b	0.063118	1	0.43682	1
WPP	CSSM19bu	TGLA263b	0.379614	1	0.528812	1
WPP	ETH10buf	TGLA263b	0.213904	1	0.638076	1
WPP	ILSTS026	TGLA263b	0.000456	0.39672	0.087448	1
WPP	INRA006b	TGLA263b	0.001024	0.89088	0.143678	1
WPP	SPS115bu	TGLA263b	0.072528	1	0.019951	1
WPP	TGLA227b	TGLA263b	0.145886	1	0.09441	1
P001	BM1824bu	BM3205bu	0	0	0.347904	1
P001	BM1824bu	BM3517bu	0.10671	1	0.078125	1
P001	BM3205bu	BM3517bu	0.016082	1	0.717732	1
P001	BM1824bu	BM719buf	0.041032	1	1	1
P001	BM3205bu	BM719buf	0.00824	1	0.106908	1
P001	BM3517bu	BM719buf	0.00468	1	1	1
P001	BM1824bu	CSSM19bu	0	0	0.000267	1
P001	BM3205bu	CSSM19bu	0	0	0.150336	1
P001	BM3517bu	CSSM19bu	0.00143	1	0.020604	1
P001	BM719buf	CSSM19bu	0.00069	0.6003	1	1
P001	BM1824bu	ETH10buf	0.009692	1	0.880873	1
P001	BM3205bu	ETH10buf	0.291184	1	0.745591	1
P001	BM3517bu	ETH10buf	0.002914	1	0.96088	1
P001	BM719buf	ETH10buf	0.005904	1	0.217246	1
P001	CSSM19bu	ETH10buf	0	0	0.77555	1
P001	BM1824bu	ILSTS026	0	0	1	1
P001	BM3205bu	ILSTS026	0.000498	0.43326	1	1
P001	BM3517bu	ILSTS026	0.003136	1	0.717158	1
P001	BM719buf	ILSTS026	0	0	1	1
P001	CSSM19bu	ILSTS026	0	0	1	1
P001	ETH10buf	ILSTS026	0	0	0.342051	1
P001	BM1824bu	INRA006b	0.000676	0.58812	1	1
P001	BM3205bu	INRA006b	0.011906	1	0.294958	1
P001	BM3517bu	INRA006b	0	0	0.018339	1
P001	BM719buf	INRA006b	7e-05	0.0609	1	1
P001	CSSM19bu	INRA006b	0	0	0.694958	1
P001	ETH10buf	INRA006b	0.00019	0.1653	0.455479	1
P001	ILSTS026	INRA006b	0	0	0.11129	1
P001	BM1824bu	SPS115bu	0.012254	1	0.399109	1
P001	BM3205bu	SPS115bu	0.062176	1	1	1
P001	BM3517bu	SPS115bu	0	0	0.571165	1
P001	BM719buf	SPS115bu	0.03854	1	1	1
P001	CSSM19bu	SPS115bu	0	0	0.558056	1
P001	ETH10buf	SPS115bu	0.406006	1	0.648502	1
P001	ILSTS026	SPS115bu	0.214422	1	1	1
P001	INRA006b	SPS115bu	0.017548	1	0.41245	1
P001	BM1824bu	TGLA227b	0.033522	1	1	1
P001	BM3205bu	TGLA227b	0.720252	1	0.041616	1
P001	BM3517bu	TGLA227b	0.103166	1	0.462624	1
P001	BM719buf	TGLA227b	0.536292	1	0.767166	1
P001	CSSM19bu	TGLA227b	0.325034	1	0.474064	1
P001	ETH10buf	TGLA227b	0.375314	1	0.393399	1
P001	ILSTS026	TGLA227b	0.186986	1	0.724369	1
P001	INRA006b	TGLA227b	0.88707	1	0.703654	1
P001	SPS115bu	TGLA227b	0.56514	1	0.919594	1
P001	BM1824bu	TGLA263b	0.000668	0.58116	0.360292	1
P001	BM3205bu	TGLA263b	0.023156	1	0.719717	1
P001	BM3517bu	TGLA263b	0.77871	1	0.803173	1
P001	BM719buf	TGLA263b	0	0	0.059605	1
P001	CSSM19bu	TGLA263b	0	0	0.616795	1
P001	ETH10buf	TGLA263b	0	0	0.367119	1
P001	ILSTS026	TGLA263b	0	0	0.754927	1
P001	INRA006b	TGLA263b	0	0	0.256065	1
P001	SPS115bu	TGLA263b	0	0	0.083455	1
P001	TGLA227b	TGLA263b	0.540424	1	0.975747	1
P002	BM1824bu	BM3205bu	0	0	0.770485	1
P002	BM1824bu	BM3517bu	0	0	0.347277	1
P002	BM3205bu	BM3517bu	0	0	0.989333	1
P002	BM1824bu	BM719buf	0	0	1	1
P002	BM3205bu	BM719buf	0	0	1	1
P002	BM3517bu	BM719buf	0.01828	1	0.911906	1
P002	BM1824bu	CSSM19bu	0	0	0	1
P002	BM3205bu	CSSM19bu	0	0	0.056893	1
P002	BM3517bu	CSSM19bu	0	0	0.910536	1
P002	BM719buf	CSSM19bu	0	0	0.256123	1
P002	BM1824bu	ETH10buf	0.005072	1	0.329603	1
P002	BM3205bu	ETH10buf	0.003812	1	0.237553	1
P002	BM3517bu	ETH10buf	0.004306	1	0.234231	1
P002	BM719buf	ETH10buf	0.045426	1	0.997954	1
P002	CSSM19bu	ETH10buf	0.0111	1	0.708382	1
P002	BM1824bu	ILSTS026	0	0	1	1
P002	BM3205bu	ILSTS026	0	0	0.718248	1
P002	BM3517bu	ILSTS026	0	0	0.951398	1
P002	BM719buf	ILSTS026	0	0	0.118029	1
P002	CSSM19bu	ILSTS026	0	0	0.814614	1
P002	ETH10buf	ILSTS026	0.003444	1	0.5865	1
P002	BM1824bu	INRA006b	0.012002	1	0.952384	1
P002	BM3205bu	INRA006b	0.021688	1	0.849129	1
P002	BM3517bu	INRA006b	0.031768	1	0.94352	1
P002	BM719buf	INRA006b	0.015308	1	0.820635	1
P002	CSSM19bu	INRA006b	0	0	0.994424	1
P002	ETH10buf	INRA006b	0.001114	0.96918	0.840712	1
P002	ILSTS026	INRA006b	0	0	0.068255	1
P002	BM1824bu	SPS115bu	0.045498	1	0.885225	1
P002	BM3205bu	SPS115bu	0	0	0.929481	1
P002	BM3517bu	SPS115bu	0.052738	1	0.945518	1
P002	BM719buf	SPS115bu	0	0	1	1
P002	CSSM19bu	SPS115bu	0	0	0.978157	1
P002	ETH10buf	SPS115bu	0.25608	1	0.968972	1
P002	ILSTS026	SPS115bu	0	0	0.319486	1
P002	INRA006b	SPS115bu	0	0	0.596472	1
P002	BM1824bu	TGLA227b	0.004224	1	0.037858	1
P002	BM3205bu	TGLA227b	0.054956	1	0.553199	1
P002	BM3517bu	TGLA227b	0.003522	1	0.402727	1
P002	BM719buf	TGLA227b	0.041704	1	0.282961	1
P002	CSSM19bu	TGLA227b	0.003874	1	0.511549	1
P002	ETH10buf	TGLA227b	0.292552	1	0.936419	1
P002	ILSTS026	TGLA227b	0	0	0.885353	1
P002	INRA006b	TGLA227b	0.012888	1	0.398784	1
P002	SPS115bu	TGLA227b	0	0	0.154977	1
P002	BM1824bu	TGLA263b	0.131906	1	0.97543	1
P002	BM3205bu	TGLA263b	0	0	0.582257	1
P002	BM3517bu	TGLA263b	0.157418	1	0.229629	1
P002	BM719buf	TGLA263b	0.033162	1	0.788153	1
P002	CSSM19bu	TGLA263b	3.8e-05	0.03306	0.068903	1
P002	ETH10buf	TGLA263b	0.103882	1	0.442724	1
P002	ILSTS026	TGLA263b	0	0	0.227451	1
P002	INRA006b	TGLA263b	0	0	0.470595	1
P002	SPS115bu	TGLA263b	0.001324	1	0.855002	1
P002	TGLA227b	TGLA263b	0.116028	1	0.511908	1
P003	BM1824bu	BM3205bu	0.000892	0.77604	1	1
P003	BM1824bu	BM3517bu	0.229312	1	1	1
P003	BM3205bu	BM3517bu	0.020338	1	0.604524	1
P003	BM1824bu	BM719buf	0.427034	1	1	1
P003	BM3205bu	BM719buf	0.247566	1	1	1
P003	BM3517bu	BM719buf	0.50132	1	1	1
P003	BM1824bu	CSSM19bu	0	0	1	1
P003	BM3205bu	CSSM19bu	0.05795	1	1	1
P003	BM3517bu	CSSM19bu	0.013904	1	0.740638	1
P003	BM719buf	CSSM19bu	0.145804	1	1	1
P003	BM1824bu	ETH10buf	0.974352	1	1	1
P003	BM3205bu	ETH10buf	0.702718	1	1	1
P003	BM3517bu	ETH10buf	0.067884	1	0.314948	1
P003	BM719buf	ETH10buf	0.70195	1	1	1
P003	CSSM19bu	ETH10buf	0.823206	1	1	1
P003	BM1824bu	ILSTS026	0.006124	1	1	1
P003	BM3205bu	ILSTS026	0.022184	1	1	1
P003	BM3517bu	ILSTS026	0.001702	1	0.605779	1
P003	BM719buf	ILSTS026	0.00608	1	0.211778	1
P003	CSSM19bu	ILSTS026	0	0	0.392737	1
P003	ETH10buf	ILSTS026	0.747674	1	0.772964	1
P003	BM1824bu	INRA006b	0.041208	1	1	1
P003	BM3205bu	INRA006b	0.05869	1	1	1
P003	BM3517bu	INRA006b	0.04228	1	1	1
P003	BM719buf	INRA006b	0.156322	1	1	1
P003	CSSM19bu	INRA006b	0.005106	1	0.141821	1
P003	ETH10buf	INRA006b	0.534	1	1	1
P003	ILSTS026	INRA006b	0	0	0.108328	1
P003	BM1824bu	SPS115bu	NA	NA	NA	1
P003	BM3205bu	SPS115bu	NA	NA	NA	1
P003	BM3517bu	SPS115bu	NA	NA	NA	1
P003	BM719buf	SPS115bu	NA	NA	NA	1
P003	CSSM19bu	SPS115bu	NA	NA	NA	1
P003	ETH10buf	SPS115bu	NA	NA	NA	1
P003	ILSTS026	SPS115bu	NA	NA	NA	1
P003	INRA006b	SPS115bu	NA	NA	NA	1
P003	BM1824bu	TGLA227b	0.266146	1	1	1
P003	BM3205bu	TGLA227b	0.046632	1	1	1
P003	BM3517bu	TGLA227b	0.317146	1	0.62739	1
P003	BM719buf	TGLA227b	0.060358	1	0.0151	1
P003	CSSM19bu	TGLA227b	0.421026	1	1	1
P003	ETH10buf	TGLA227b	0.288766	1	1	1
P003	ILSTS026	TGLA227b	0.001414	1	0.322455	1
P003	INRA006b	TGLA227b	0.145906	1	1	1
P003	SPS115bu	TGLA227b	NA	NA	NA	1
P003	BM1824bu	TGLA263b	0.442476	1	1	1
P003	BM3205bu	TGLA263b	0.586802	1	1	1
P003	BM3517bu	TGLA263b	0.804042	1	0.913977	1
P003	BM719buf	TGLA263b	0.42363	1	0.385933	1
P003	CSSM19bu	TGLA263b	0.524302	1	1	1
P003	ETH10buf	TGLA263b	0.358804	1	0.657442	1
P003	ILSTS026	TGLA263b	0.100428	1	0.57335	1
P003	INRA006b	TGLA263b	0.056116	1	1	1
P003	SPS115bu	TGLA263b	NA	NA	NA	1
P003	TGLA227b	TGLA263b	0.047824	1	0.128888	1
P004	BM1824bu	BM3205bu	0	0	0.518639	1
P004	BM1824bu	BM3517bu	0.000414	0.36018	0.988237	1
P004	BM3205bu	BM3517bu	0.013938	1	0.400589	1
P004	BM1824bu	BM719buf	0	0	1	1
P004	BM3205bu	BM719buf	0	0	1	1
P004	BM3517bu	BM719buf	0	0	0.102932	1
P004	BM1824bu	CSSM19bu	0	0	0	1
P004	BM3205bu	CSSM19bu	0	0	0.436402	1
P004	BM3517bu	CSSM19bu	0	0	0.705983	1
P004	BM719buf	CSSM19bu	0	0	1	1
P004	BM1824bu	ETH10buf	0	0	0.71578	1
P004	BM3205bu	ETH10buf	0.004168	1	0.986662	1
P004	BM3517bu	ETH10buf	0.02107	1	0.608325	1
P004	BM719buf	ETH10buf	0.0034	1	0.193173	1
P004	CSSM19bu	ETH10buf	0	0	0.042657	1
P004	BM1824bu	ILSTS026	0	0	0.114192	1
P004	BM3205bu	ILSTS026	0	0	0.743455	1
P004	BM3517bu	ILSTS026	0.000188	0.16356	0.997686	1
P004	BM719buf	ILSTS026	0	0	1	1
P004	CSSM19bu	ILSTS026	0	0	0.169238	1
P004	ETH10buf	ILSTS026	0.000416	0.36192	0.611482	1
P004	BM1824bu	INRA006b	0	0	0.905839	1
P004	BM3205bu	INRA006b	0	0	1	1
P004	BM3517bu	INRA006b	0	0	0.797258	1
P004	BM719buf	INRA006b	0	0	0.843121	1
P004	CSSM19bu	INRA006b	0	0	0.993718	1
P004	ETH10buf	INRA006b	0.048628	1	0.312946	1
P004	ILSTS026	INRA006b	0	0	0.140702	1
P004	BM1824bu	SPS115bu	0	0	0.681259	1
P004	BM3205bu	SPS115bu	0	0	0.731628	1
P004	BM3517bu	SPS115bu	0.001134	0.98658	0.308656	1
P004	BM719buf	SPS115bu	0	0	0.626647	1
P004	CSSM19bu	SPS115bu	0	0	1	1
P004	ETH10buf	SPS115bu	3.4e-05	0.02958	0.167496	1
P004	ILSTS026	SPS115bu	0	0	0.679062	1
P004	INRA006b	SPS115bu	0	0	0.48497	1
P004	BM1824bu	TGLA227b	0.320048	1	0.992324	1
P004	BM3205bu	TGLA227b	0.013034	1	0.417899	1
P004	BM3517bu	TGLA227b	0.000568	0.49416	0.393402	1
P004	BM719buf	TGLA227b	0	0	0.40688	1
P004	CSSM19bu	TGLA227b	0.111944	1	0.854781	1
P004	ETH10buf	TGLA227b	0.022486	1	0.033698	1
P004	ILSTS026	TGLA227b	0.10091	1	0.959107	1
P004	INRA006b	TGLA227b	0.0061	1	0.843527	1
P004	SPS115bu	TGLA227b	0.022708	1	0.80587	1
P004	BM1824bu	TGLA263b	0.001076	0.93612	0.151067	1
P004	BM3205bu	TGLA263b	0.000212	0.18444	0.596565	1
P004	BM3517bu	TGLA263b	0.01305	1	0.023224	1
P004	BM719buf	TGLA263b	0	0	0.375049	1
P004	CSSM19bu	TGLA263b	0	0	0.376104	1
P004	ETH10buf	TGLA263b	0.0385	1	0.123169	1
P004	ILSTS026	TGLA263b	0	0	0.231488	1
P004	INRA006b	TGLA263b	0	0	0.537671	1
P004	SPS115bu	TGLA263b	0	0	0.24746	1
P004	TGLA227b	TGLA263b	0.001128	0.98136	0.65423	1
P005	BM1824bu	BM3205bu	0	0	1	1
P005	BM1824bu	BM3517bu	0.003342	1	0.131915	1
P005	BM3205bu	BM3517bu	0.011134	1	0.81738	1
P005	BM1824bu	BM719buf	0.00885	1	1	1
P005	BM3205bu	BM719buf	0.00594	1	1	1
P005	BM3517bu	BM719buf	0.435484	1	1	1
P005	BM1824bu	CSSM19bu	0	0	0.444898	1
P005	BM3205bu	CSSM19bu	0	0	1	1
P005	BM3517bu	CSSM19bu	0.01078	1	0.124186	1
P005	BM719buf	CSSM19bu	0.21856	1	0.382377	1
P005	BM1824bu	ETH10buf	0.796604	1	0.810723	1
P005	BM3205bu	ETH10buf	0.029686	1	0.487401	1
P005	BM3517bu	ETH10buf	0.00169	1	0.084498	1
P005	BM719buf	ETH10buf	0.005368	1	0.318363	1
P005	CSSM19bu	ETH10buf	0.338646	1	0.309801	1
P005	BM1824bu	ILSTS026	0	0	1	1
P005	BM3205bu	ILSTS026	0.013336	1	1	1
P005	BM3517bu	ILSTS026	0.00343	1	0.870102	1
P005	BM719buf	ILSTS026	0.23983	1	1	1
P005	CSSM19bu	ILSTS026	0.073572	1	0.433385	1
P005	ETH10buf	ILSTS026	0.010148	1	0.522716	1
P005	BM1824bu	INRA006b	0.060014	1	0.230885	1
P005	BM3205bu	INRA006b	0.007152	1	1	1
P005	BM3517bu	INRA006b	0.039396	1	0.797693	1
P005	BM719buf	INRA006b	0.000276	0.24012	0.151357	1
P005	CSSM19bu	INRA006b	0.032016	1	0.506324	1
P005	ETH10buf	INRA006b	0.373784	1	0.79394	1
P005	ILSTS026	INRA006b	0.000208	0.18096	1	1
P005	BM1824bu	SPS115bu	0.015792	1	1	1
P005	BM3205bu	SPS115bu	0.028888	1	1	1
P005	BM3517bu	SPS115bu	0.000772	0.67164	0.69681	1
P005	BM719buf	SPS115bu	0.43772	1	1	1
P005	CSSM19bu	SPS115bu	0.040946	1	0.482465	1
P005	ETH10buf	SPS115bu	0.11892	1	0.478707	1
P005	ILSTS026	SPS115bu	0	0	1	1
P005	INRA006b	SPS115bu	0.029606	1	0.711873	1
P005	BM1824bu	TGLA227b	0.34642	1	0.432752	1
P005	BM3205bu	TGLA227b	0.128054	1	0.491449	1
P005	BM3517bu	TGLA227b	0.239674	1	0.606165	1
P005	BM719buf	TGLA227b	0.600134	1	0.958463	1
P005	CSSM19bu	TGLA227b	0.23026	1	0.37929	1
P005	ETH10buf	TGLA227b	0.237872	1	0.523643	1
P005	ILSTS026	TGLA227b	0.057168	1	0.968704	1
P005	INRA006b	TGLA227b	0.377994	1	0.787082	1
P005	SPS115bu	TGLA227b	0.061382	1	0.203825	1
P005	BM1824bu	TGLA263b	0.006998	1	1	1
P005	BM3205bu	TGLA263b	0.035402	1	0.115295	1
P005	BM3517bu	TGLA263b	0.205832	1	0.998457	1
P005	BM719buf	TGLA263b	0.153556	1	0.190146	1
P005	CSSM19bu	TGLA263b	0.308504	1	0.792305	1
P005	ETH10buf	TGLA263b	0.425538	1	0.852514	1
P005	ILSTS026	TGLA263b	0.15619	1	1	1
P005	INRA006b	TGLA263b	0.012166	1	0.06404	1
P005	SPS115bu	TGLA263b	0.050556	1	0.722445	1
P005	TGLA227b	TGLA263b	0.22485	1	0.646874	1
P006	BM1824bu	BM3205bu	0	0	1	1
P006	BM1824bu	BM3517bu	0.358704	1	1	1
P006	BM3205bu	BM3517bu	0.445928	1	0.481813	1
P006	BM1824bu	BM719buf	0.04751	1	1	1
P006	BM3205bu	BM719buf	0.00546	1	0.585334	1
P006	BM3517bu	BM719buf	0.0414	1	0.820746	1
P006	BM1824bu	CSSM19bu	0	0	0.677707	1
P006	BM3205bu	CSSM19bu	0	0	0.269976	1
P006	BM3517bu	CSSM19bu	0.345904	1	0.990169	1
P006	BM719buf	CSSM19bu	0.00251	1	0.885875	1
P006	BM1824bu	ETH10buf	0.184798	1	0.10119	1
P006	BM3205bu	ETH10buf	0.678162	1	0.942463	1
P006	BM3517bu	ETH10buf	0.123006	1	0.120616	1
P006	BM719buf	ETH10buf	0.063854	1	0.399432	1
P006	CSSM19bu	ETH10buf	0.087862	1	0.758434	1
P006	BM1824bu	ILSTS026	0.021464	1	0.375896	1
P006	BM3205bu	ILSTS026	0	0	0.67981	1
P006	BM3517bu	ILSTS026	0.528448	1	0.922893	1
P006	BM719buf	ILSTS026	0.00163	1	0.547454	1
P006	CSSM19bu	ILSTS026	0.000322	0.28014	0.152921	1
P006	ETH10buf	ILSTS026	0.033718	1	0.624625	1
P006	BM1824bu	INRA006b	0.00671	1	1	1
P006	BM3205bu	INRA006b	0.00034	0.2958	0.711005	1
P006	BM3517bu	INRA006b	0.145236	1	0.836842	1
P006	BM719buf	INRA006b	0.000454	0.39498	0.484042	1
P006	CSSM19bu	INRA006b	0	0	0.405902	1
P006	ETH10buf	INRA006b	0.002386	1	0.778441	1
P006	ILSTS026	INRA006b	0	0	0.358427	1
P006	BM1824bu	SPS115bu	0.094714	1	1	1
P006	BM3205bu	SPS115bu	0.001328	1	1	1
P006	BM3517bu	SPS115bu	0.113504	1	0.933798	1
P006	BM719buf	SPS115bu	0	0	1	1
P006	CSSM19bu	SPS115bu	0	0	0.493151	1
P006	ETH10buf	SPS115bu	0.27214	1	0.676357	1
P006	ILSTS026	SPS115bu	0	0	0.806921	1
P006	INRA006b	SPS115bu	0	0	0.107883	1
P006	BM1824bu	TGLA227b	0.233056	1	0.574445	1
P006	BM3205bu	TGLA227b	0.041508	1	0.52678	1
P006	BM3517bu	TGLA227b	0.688578	1	0.450155	1
P006	BM719buf	TGLA227b	0.020388	1	0.385944	1
P006	CSSM19bu	TGLA227b	0.281472	1	0.224046	1
P006	ETH10buf	TGLA227b	0.245078	1	0.950478	1
P006	ILSTS026	TGLA227b	0.3337	1	0.430326	1
P006	INRA006b	TGLA227b	0	0	0.600687	1
P006	SPS115bu	TGLA227b	0.367492	1	0.097485	1
P006	BM1824bu	TGLA263b	0.007848	1	0.989158	1
P006	BM3205bu	TGLA263b	0.020988	1	0.917716	1
P006	BM3517bu	TGLA263b	0.159852	1	0.389634	1
P006	BM719buf	TGLA263b	0.000944	0.82128	0.74502	1
P006	CSSM19bu	TGLA263b	0.001586	1	0.586702	1
P006	ETH10buf	TGLA263b	0.035932	1	0.086294	1
P006	ILSTS026	TGLA263b	0	0	0.057186	1
P006	INRA006b	TGLA263b	0	0	0.575118	1
P006	SPS115bu	TGLA263b	0.009486	1	0.731853	1
P006	TGLA227b	TGLA263b	0.129644	1	0.87511	1
P007	BM1824bu	BM3205bu	0	0	1	1
P007	BM1824bu	BM3517bu	0.703048	1	1	1
P007	BM3205bu	BM3517bu	0.876708	1	1	1
P007	BM1824bu	BM719buf	0.288562	1	NA	1
P007	BM3205bu	BM719buf	0.19008	1	NA	1
P007	BM3517bu	BM719buf	1	1	NA	1
P007	BM1824bu	CSSM19bu	0	0	1	1
P007	BM3205bu	CSSM19bu	0	0	0.055393	1
P007	BM3517bu	CSSM19bu	0.577946	1	0.258636	1
P007	BM719buf	CSSM19bu	0.072406	1	NA	1
P007	BM1824bu	ETH10buf	0.0274	1	0.250543	1
P007	BM3205bu	ETH10buf	0.332972	1	1	1
P007	BM3517bu	ETH10buf	0.460554	1	0.324257	1
P007	BM719buf	ETH10buf	0.218346	1	NA	1
P007	CSSM19bu	ETH10buf	0.135198	1	0.445699	1
P007	BM1824bu	ILSTS026	1	1	1	1
P007	BM3205bu	ILSTS026	1	1	1	1
P007	BM3517bu	ILSTS026	0.491638	1	1	1
P007	BM719buf	ILSTS026	1	1	NA	1
P007	CSSM19bu	ILSTS026	0.410434	1	1	1
P007	ETH10buf	ILSTS026	1	1	1	1
P007	BM1824bu	INRA006b	1	1	NA	1
P007	BM3205bu	INRA006b	0.260316	1	NA	1
P007	BM3517bu	INRA006b	1	1	NA	1
P007	BM719buf	INRA006b	1	1	NA	1
P007	CSSM19bu	INRA006b	1	1	NA	1
P007	ETH10buf	INRA006b	0.000826	0.71862	NA	1
P007	ILSTS026	INRA006b	1	1	NA	1
P007	BM1824bu	SPS115bu	0.142834	1	1	1
P007	BM3205bu	SPS115bu	0.179324	1	0.162053	1
P007	BM3517bu	SPS115bu	0.389896	1	0.635875	1
P007	BM719buf	SPS115bu	1	1	NA	1
P007	CSSM19bu	SPS115bu	0.099464	1	0.308252	1
P007	ETH10buf	SPS115bu	0.029772	1	0.913157	1
P007	ILSTS026	SPS115bu	0.47003	1	1	1
P007	INRA006b	SPS115bu	0.053546	1	NA	1
P007	BM1824bu	TGLA227b	0.385044	1	1	1
P007	BM3205bu	TGLA227b	0.92961	1	1	1
P007	BM3517bu	TGLA227b	0.675832	1	1	1
P007	BM719buf	TGLA227b	0.313376	1	NA	1
P007	CSSM19bu	TGLA227b	0.92976	1	1	1
P007	ETH10buf	TGLA227b	0.109154	1	0.498995	1
P007	ILSTS026	TGLA227b	0.499412	1	0.58431	1
P007	INRA006b	TGLA227b	0.879558	1	NA	1
P007	SPS115bu	TGLA227b	0.282174	1	1	1
P007	BM1824bu	TGLA263b	0.373834	1	1	1
P007	BM3205bu	TGLA263b	0.643244	1	1	1
P007	BM3517bu	TGLA263b	0.080176	1	0.120327	1
P007	BM719buf	TGLA263b	0.042646	1	NA	1
P007	CSSM19bu	TGLA263b	0.73781	1	1	1
P007	ETH10buf	TGLA263b	0.208362	1	0.817667	1
P007	ILSTS026	TGLA263b	1	1	1	1
P007	INRA006b	TGLA263b	1	1	NA	1
P007	SPS115bu	TGLA263b	0.630728	1	0.638691	1
P007	TGLA227b	TGLA263b	0.206906	1	0.306701	1
P008	BM1824bu	BM3205bu	0	0	1	1
P008	BM1824bu	BM3517bu	0.395568	1	0.955356	1
P008	BM3205bu	BM3517bu	0.068778	1	0.932147	1
P008	BM1824bu	BM719buf	0.653092	1	1	1
P008	BM3205bu	BM719buf	0.544232	1	1	1
P008	BM3517bu	BM719buf	0.13551	1	0.734516	1
P008	BM1824bu	CSSM19bu	0	0	0.020933	1
P008	BM3205bu	CSSM19bu	0	0	0.25962	1
P008	BM3517bu	CSSM19bu	0.106256	1	0.737763	1
P008	BM719buf	CSSM19bu	0	0	0.725221	1
P008	BM1824bu	ETH10buf	0.070592	1	0.157392	1
P008	BM3205bu	ETH10buf	0.625116	1	0.512556	1
P008	BM3517bu	ETH10buf	0.009256	1	0.027901	1
P008	BM719buf	ETH10buf	0.098644	1	0.671771	1
P008	CSSM19bu	ETH10buf	0.463802	1	0.536291	1
P008	BM1824bu	ILSTS026	0.033614	1	0.171038	1
P008	BM3205bu	ILSTS026	0.169946	1	0.551955	1
P008	BM3517bu	ILSTS026	0.099844	1	0.018573	1
P008	BM719buf	ILSTS026	0.012864	1	1	1
P008	CSSM19bu	ILSTS026	0.142658	1	0.840677	1
P008	ETH10buf	ILSTS026	0.005886	1	0.042495	1
P008	BM1824bu	INRA006b	0.072466	1	1	1
P008	BM3205bu	INRA006b	0.015694	1	1	1
P008	BM3517bu	INRA006b	0.002368	1	0.685184	1
P008	BM719buf	INRA006b	0.002442	1	0.352925	1
P008	CSSM19bu	INRA006b	0.016632	1	0.854221	1
P008	ETH10buf	INRA006b	0.030658	1	0.711614	1
P008	ILSTS026	INRA006b	0.043644	1	1	1
P008	BM1824bu	SPS115bu	0.00275	1	0.033654	1
P008	BM3205bu	SPS115bu	0.42438	1	0.238678	1
P008	BM3517bu	SPS115bu	0.43794	1	0.955954	1
P008	BM719buf	SPS115bu	0.02235	1	1	1
P008	CSSM19bu	SPS115bu	0.060804	1	0.292839	1
P008	ETH10buf	SPS115bu	0.041514	1	0.398318	1
P008	ILSTS026	SPS115bu	0.135142	1	0.574281	1
P008	INRA006b	SPS115bu	0.195898	1	1	1
P008	BM1824bu	TGLA227b	0.120484	1	0.748493	1
P008	BM3205bu	TGLA227b	0.378156	1	0.937112	1
P008	BM3517bu	TGLA227b	0.98286	1	0.960578	1
P008	BM719buf	TGLA227b	0.205028	1	0.363238	1
P008	CSSM19bu	TGLA227b	0.903364	1	0.805087	1
P008	ETH10buf	TGLA227b	0.110918	1	0.596185	1
P008	ILSTS026	TGLA227b	0.932308	1	0.787502	1
P008	INRA006b	TGLA227b	0.253884	1	0.227848	1
P008	SPS115bu	TGLA227b	0.9792	1	0.957692	1
P008	BM1824bu	TGLA263b	0.24586	1	0.576627	1
P008	BM3205bu	TGLA263b	0.206896	1	0.457392	1
P008	BM3517bu	TGLA263b	0.042904	1	0.483577	1
P008	BM719buf	TGLA263b	0.175342	1	0.983325	1
P008	CSSM19bu	TGLA263b	0.123176	1	0.496452	1
P008	ETH10buf	TGLA263b	0.02156	1	0.594695	1
P008	ILSTS026	TGLA263b	0.009372	1	0.528173	1
P008	INRA006b	TGLA263b	0.000102	0.08874	0.185801	1
P008	SPS115bu	TGLA263b	0.884244	1	1	1
P008	TGLA227b	TGLA263b	0.230776	1	0.349384	1
P009	BM1824bu	BM3205bu	0	0	0.177949	1
P009	BM1824bu	BM3517bu	0.110212	1	0.847569	1
P009	BM3205bu	BM3517bu	0	0	0.421292	1
P009	BM1824bu	BM719buf	0	0	0.348336	1
P009	BM3205bu	BM719buf	0.612758	1	1	1
P009	BM3517bu	BM719buf	0.007176	1	0.532029	1
P009	BM1824bu	CSSM19bu	0	0	0.000347	1
P009	BM3205bu	CSSM19bu	0	0	0.068884	1
P009	BM3517bu	CSSM19bu	0.06821	1	0.385376	1
P009	BM719buf	CSSM19bu	0.26179	1	0.478925	1
P009	BM1824bu	ETH10buf	0.78991	1	0.896266	1
P009	BM3205bu	ETH10buf	0.40964	1	0.955967	1
P009	BM3517bu	ETH10buf	0.107092	1	0.471763	1
P009	BM719buf	ETH10buf	0.03142	1	0.459304	1
P009	CSSM19bu	ETH10buf	0.71054	1	0.911321	1
P009	BM1824bu	ILSTS026	0.000862	0.74994	1	1
P009	BM3205bu	ILSTS026	0	0	0.447257	1
P009	BM3517bu	ILSTS026	0.015088	1	0.573541	1
P009	BM719buf	ILSTS026	0.001116	0.97092	1	1
P009	CSSM19bu	ILSTS026	0	0	0.802117	1
P009	ETH10buf	ILSTS026	0.933826	1	0.824758	1
P009	BM1824bu	INRA006b	0.00121	1	0.275365	1
P009	BM3205bu	INRA006b	0	0	0.182581	1
P009	BM3517bu	INRA006b	0.005334	1	0.568613	1
P009	BM719buf	INRA006b	0.006016	1	0.043837	1
P009	CSSM19bu	INRA006b	0.000412	0.35844	0.25449	1
P009	ETH10buf	INRA006b	0.310546	1	1	1
P009	ILSTS026	INRA006b	0	0	0.05008	1
P009	BM1824bu	SPS115bu	0.00053	0.4611	1	1
P009	BM3205bu	SPS115bu	0	0	1	1
P009	BM3517bu	SPS115bu	0.11313	1	0.587271	1
P009	BM719buf	SPS115bu	0.042448	1	1	1
P009	CSSM19bu	SPS115bu	0	0	1	1
P009	ETH10buf	SPS115bu	0.050588	1	0.362024	1
P009	ILSTS026	SPS115bu	0	0	0.41825	1
P009	INRA006b	SPS115bu	0.00015	0.1305	1	1
P009	BM1824bu	TGLA227b	0.081686	1	0.392193	1
P009	BM3205bu	TGLA227b	0.16761	1	0.930807	1
P009	BM3517bu	TGLA227b	0.000124	0.10788	0.093069	1
P009	BM719buf	TGLA227b	6.2e-05	0.05394	0.115999	1
P009	CSSM19bu	TGLA227b	0.568476	1	0.333012	1
P009	ETH10buf	TGLA227b	0.663644	1	1	1
P009	ILSTS026	TGLA227b	0.00549	1	0.799576	1
P009	INRA006b	TGLA227b	0.001382	1	0.329882	1
P009	SPS115bu	TGLA227b	0.037508	1	0.611162	1
P009	BM1824bu	TGLA263b	0.012572	1	0.048115	1
P009	BM3205bu	TGLA263b	0.119778	1	0.629631	1
P009	BM3517bu	TGLA263b	0.021814	1	0.160168	1
P009	BM719buf	TGLA263b	0.780096	1	0.861272	1
P009	CSSM19bu	TGLA263b	0.223838	1	0.35507	1
P009	ETH10buf	TGLA263b	0.414646	1	0.298578	1
P009	ILSTS026	TGLA263b	0.00668	1	0.244025	1
P009	INRA006b	TGLA263b	0.601006	1	0.627009	1
P009	SPS115bu	TGLA263b	0.25451	1	0.86862	1
P009	TGLA227b	TGLA263b	0.283982	1	0.158469	1
P010	BM1824bu	BM3205bu	0.131048	1	1	1
P010	BM1824bu	BM3517bu	0.981172	1	1	1
P010	BM3205bu	BM3517bu	0.433304	1	1	1
P010	BM1824bu	BM719buf	0.418264	1	1	1
P010	BM3205bu	BM719buf	0.566266	1	1	1
P010	BM3517bu	BM719buf	0.616842	1	1	1
P010	BM1824bu	CSSM19bu	0	0	0.249412	1
P010	BM3205bu	CSSM19bu	0.002994	1	1	1
P010	BM3517bu	CSSM19bu	0.759802	1	0.592566	1
P010	BM719buf	CSSM19bu	0.205122	1	1	1
P010	BM1824bu	ETH10buf	0.379836	1	0.98298	1
P010	BM3205bu	ETH10buf	0.206654	1	0.74222	1
P010	BM3517bu	ETH10buf	0.271042	1	0.626194	1
P010	BM719buf	ETH10buf	0.737554	1	0.775242	1
P010	CSSM19bu	ETH10buf	0.802078	1	0.76154	1
P010	BM1824bu	ILSTS026	0.531104	1	1	1
P010	BM3205bu	ILSTS026	0.584158	1	1	1
P010	BM3517bu	ILSTS026	1	1	1	1
P010	BM719buf	ILSTS026	0.606506	1	1	1
P010	CSSM19bu	ILSTS026	1	1	1	1
P010	ETH10buf	ILSTS026	0.460944	1	0.905789	1
P010	BM1824bu	INRA006b	0.13705	1	0.645792	1
P010	BM3205bu	INRA006b	0.149402	1	1	1
P010	BM3517bu	INRA006b	0.4075	1	0.345941	1
P010	BM719buf	INRA006b	0.02751	1	1	1
P010	CSSM19bu	INRA006b	0.437972	1	0.654113	1
P010	ETH10buf	INRA006b	0.180192	1	0.206237	1
P010	ILSTS026	INRA006b	0.006366	1	0.469773	1
P010	BM1824bu	SPS115bu	0.307072	1	1	1
P010	BM3205bu	SPS115bu	0.026242	1	1	1
P010	BM3517bu	SPS115bu	0.655508	1	1	1
P010	BM719buf	SPS115bu	0.145688	1	1	1
P010	CSSM19bu	SPS115bu	0.629764	1	1	1
P010	ETH10buf	SPS115bu	0.625352	1	1	1
P010	ILSTS026	SPS115bu	1	1	1	1
P010	INRA006b	SPS115bu	0.727906	1	1	1
P010	BM1824bu	TGLA227b	0.353754	1	0.36827	1
P010	BM3205bu	TGLA227b	0.713068	1	0.836294	1
P010	BM3517bu	TGLA227b	0.116774	1	0.234362	1
P010	BM719buf	TGLA227b	0.608726	1	0.862081	1
P010	CSSM19bu	TGLA227b	0.607478	1	0.36523	1
P010	ETH10buf	TGLA227b	0.630866	1	0.765875	1
P010	ILSTS026	TGLA227b	0.507084	1	0.89058	1
P010	INRA006b	TGLA227b	0.651048	1	0.727008	1
P010	SPS115bu	TGLA227b	0.716512	1	0.581494	1
P010	BM1824bu	TGLA263b	0.46247	1	0.749511	1
P010	BM3205bu	TGLA263b	0.326534	1	1	1
P010	BM3517bu	TGLA263b	0.348306	1	0.968867	1
P010	BM719buf	TGLA263b	0.990648	1	1	1
P010	CSSM19bu	TGLA263b	0.095364	1	1	1
P010	ETH10buf	TGLA263b	0.4952	1	0.440038	1
P010	ILSTS026	TGLA263b	1	1	1	1
P010	INRA006b	TGLA263b	0.74049	1	0.996159	1
P010	SPS115bu	TGLA263b	0.031344	1	0.501234	1
P010	TGLA227b	TGLA263b	0.490858	1	1	1
P011	BM1824bu	BM3205bu	0.007958	1	1	1
P011	BM1824bu	BM3517bu	1	1	1	1
P011	BM3205bu	BM3517bu	0.57561	1	0.175831	1
P011	BM1824bu	BM719buf	0.273716	1	1	1
P011	BM3205bu	BM719buf	0.03246	1	1	1
P011	BM3517bu	BM719buf	1	1	1	1
P011	BM1824bu	CSSM19bu	0.01478	1	1	1
P011	BM3205bu	CSSM19bu	0.025834	1	1	1
P011	BM3517bu	CSSM19bu	0.340482	1	0.44932	1
P011	BM719buf	CSSM19bu	0.086996	1	0.274994	1
P011	BM1824bu	ETH10buf	0.7659	1	1	1
P011	BM3205bu	ETH10buf	1	1	1	1
P011	BM3517bu	ETH10buf	0.152282	1	0.22465	1
P011	BM719buf	ETH10buf	0.962712	1	0.977174	1
P011	CSSM19bu	ETH10buf	0.959724	1	0.966541	1
P011	BM1824bu	ILSTS026	0.56152	1	1	1
P011	BM3205bu	ILSTS026	0.583446	1	1	1
P011	BM3517bu	ILSTS026	0.023036	1	0.330375	1
P011	BM719buf	ILSTS026	1	1	1	1
P011	CSSM19bu	ILSTS026	0.45358	1	0.344805	1
P011	ETH10buf	ILSTS026	0.423886	1	0.882081	1
P011	BM1824bu	INRA006b	0.507198	1	1	1
P011	BM3205bu	INRA006b	0.02044	1	1	1
P011	BM3517bu	INRA006b	0.409428	1	0.319126	1
P011	BM719buf	INRA006b	1	1	1	1
P011	CSSM19bu	INRA006b	0.661904	1	1	1
P011	ETH10buf	INRA006b	0.314418	1	0.352095	1
P011	ILSTS026	INRA006b	0.024456	1	1	1
P011	BM1824bu	SPS115bu	1	1	NA	1
P011	BM3205bu	SPS115bu	1	1	1	1
P011	BM3517bu	SPS115bu	0.338184	1	0.137456	1
P011	BM719buf	SPS115bu	1	1	1	1
P011	CSSM19bu	SPS115bu	1	1	1	1
P011	ETH10buf	SPS115bu	0.182952	1	0.33476	1
P011	ILSTS026	SPS115bu	0.265474	1	1	1
P011	INRA006b	SPS115bu	0.280464	1	0.158445	1
P011	BM1824bu	TGLA227b	0.060084	1	1	1
P011	BM3205bu	TGLA227b	0.68755	1	0.566134	1
P011	BM3517bu	TGLA227b	0.86629	1	0.96773	1
P011	BM719buf	TGLA227b	0.696966	1	0.461722	1
P011	CSSM19bu	TGLA227b	0.658928	1	0.981839	1
P011	ETH10buf	TGLA227b	0.402382	1	0.511863	1
P011	ILSTS026	TGLA227b	0.455654	1	0.541615	1
P011	INRA006b	TGLA227b	0.605926	1	0.459927	1
P011	SPS115bu	TGLA227b	0.418308	1	0.554757	1
P011	BM1824bu	TGLA263b	0.0807	1	0.108796	1
P011	BM3205bu	TGLA263b	0.78913	1	1	1
P011	BM3517bu	TGLA263b	0.103896	1	0.326069	1
P011	BM719buf	TGLA263b	0.776742	1	1	1
P011	CSSM19bu	TGLA263b	0.982534	1	1	1
P011	ETH10buf	TGLA263b	0.31536	1	0.59577	1
P011	ILSTS026	TGLA263b	0.072354	1	0.373015	1
P011	INRA006b	TGLA263b	0.947844	1	1	1
P011	SPS115bu	TGLA263b	1	1	1	1
P011	TGLA227b	TGLA263b	0.18348	1	0.426459	1
P012	BM1824bu	BM3205bu	0.03756	1	1	1
P012	BM1824bu	BM3517bu	0.667342	1	1	1
P012	BM3205bu	BM3517bu	0.39794	1	0.53073	1
P012	BM1824bu	BM719buf	0.520486	1	1	1
P012	BM3205bu	BM719buf	0.710518	1	1	1
P012	BM3517bu	BM719buf	0.61439	1	1	1
P012	BM1824bu	CSSM19bu	0.000472	0.41064	1	1
P012	BM3205bu	CSSM19bu	0.024956	1	1	1
P012	BM3517bu	CSSM19bu	0.170772	1	1	1
P012	BM719buf	CSSM19bu	0.541208	1	1	1
P012	BM1824bu	ETH10buf	0.571006	1	0.982388	1
P012	BM3205bu	ETH10buf	0.38207	1	0.982117	1
P012	BM3517bu	ETH10buf	0.119472	1	0.204745	1
P012	BM719buf	ETH10buf	0.355362	1	0.923648	1
P012	CSSM19bu	ETH10buf	0.627736	1	1	1
P012	BM1824bu	ILSTS026	0.404588	1	1	1
P012	BM3205bu	ILSTS026	0.511166	1	1	1
P012	BM3517bu	ILSTS026	0.991776	1	1	1
P012	BM719buf	ILSTS026	1	1	1	1
P012	CSSM19bu	ILSTS026	0.605184	1	1	1
P012	ETH10buf	ILSTS026	0.12866	1	0.065624	1
P012	BM1824bu	INRA006b	0.286438	1	1	1
P012	BM3205bu	INRA006b	0.053316	1	0.675054	1
P012	BM3517bu	INRA006b	0.920314	1	0.663158	1
P012	BM719buf	INRA006b	0.154426	1	1	1
P012	CSSM19bu	INRA006b	0.346632	1	0.592186	1
P012	ETH10buf	INRA006b	0.742822	1	0.911119	1
P012	ILSTS026	INRA006b	0.691528	1	0.380718	1
P012	BM1824bu	SPS115bu	0.497174	1	1	1
P012	BM3205bu	SPS115bu	0.621162	1	1	1
P012	BM3517bu	SPS115bu	0.23373	1	1	1
P012	BM719buf	SPS115bu	0.40802	1	1	1
P012	CSSM19bu	SPS115bu	0.038172	1	0.102395	1
P012	ETH10buf	SPS115bu	0.083386	1	0.633778	1
P012	ILSTS026	SPS115bu	0.88108	1	0.20365	1
P012	INRA006b	SPS115bu	0.049078	1	0.589319	1
P012	BM1824bu	TGLA227b	0.778046	1	0.22951	1
P012	BM3205bu	TGLA227b	0.253808	1	0.131892	1
P012	BM3517bu	TGLA227b	0.558508	1	0.743107	1
P012	BM719buf	TGLA227b	0.983578	1	1	1
P012	CSSM19bu	TGLA227b	0.751282	1	0.918565	1
P012	ETH10buf	TGLA227b	1	1	0.677728	1
P012	ILSTS026	TGLA227b	0.130066	1	0.970761	1
P012	INRA006b	TGLA227b	0.02916	1	0.365267	1
P012	SPS115bu	TGLA227b	0.335284	1	0.37676	1
P012	BM1824bu	TGLA263b	0.440502	1	0.837424	1
P012	BM3205bu	TGLA263b	0.090206	1	0.833777	1
P012	BM3517bu	TGLA263b	0.979086	1	0.343988	1
P012	BM719buf	TGLA263b	0.027078	1	0.487422	1
P012	CSSM19bu	TGLA263b	0.279524	1	1	1
P012	ETH10buf	TGLA263b	0.866816	1	1	1
P012	ILSTS026	TGLA263b	0.009896	1	0.247227	1
P012	INRA006b	TGLA263b	0.050122	1	0.410944	1
P012	SPS115bu	TGLA263b	0.914808	1	0.752715	1
P012	TGLA227b	TGLA263b	0.033166	1	0.465726	1
